# Supplementary material
Source: MDPI journal article supplement (https://www.mdpi.com/1999-4907/11/10/1083)

Supplementary figure 3: The illustration of workflow of demultiplexing and Genome Analysis toolkit (GATK) pipeline

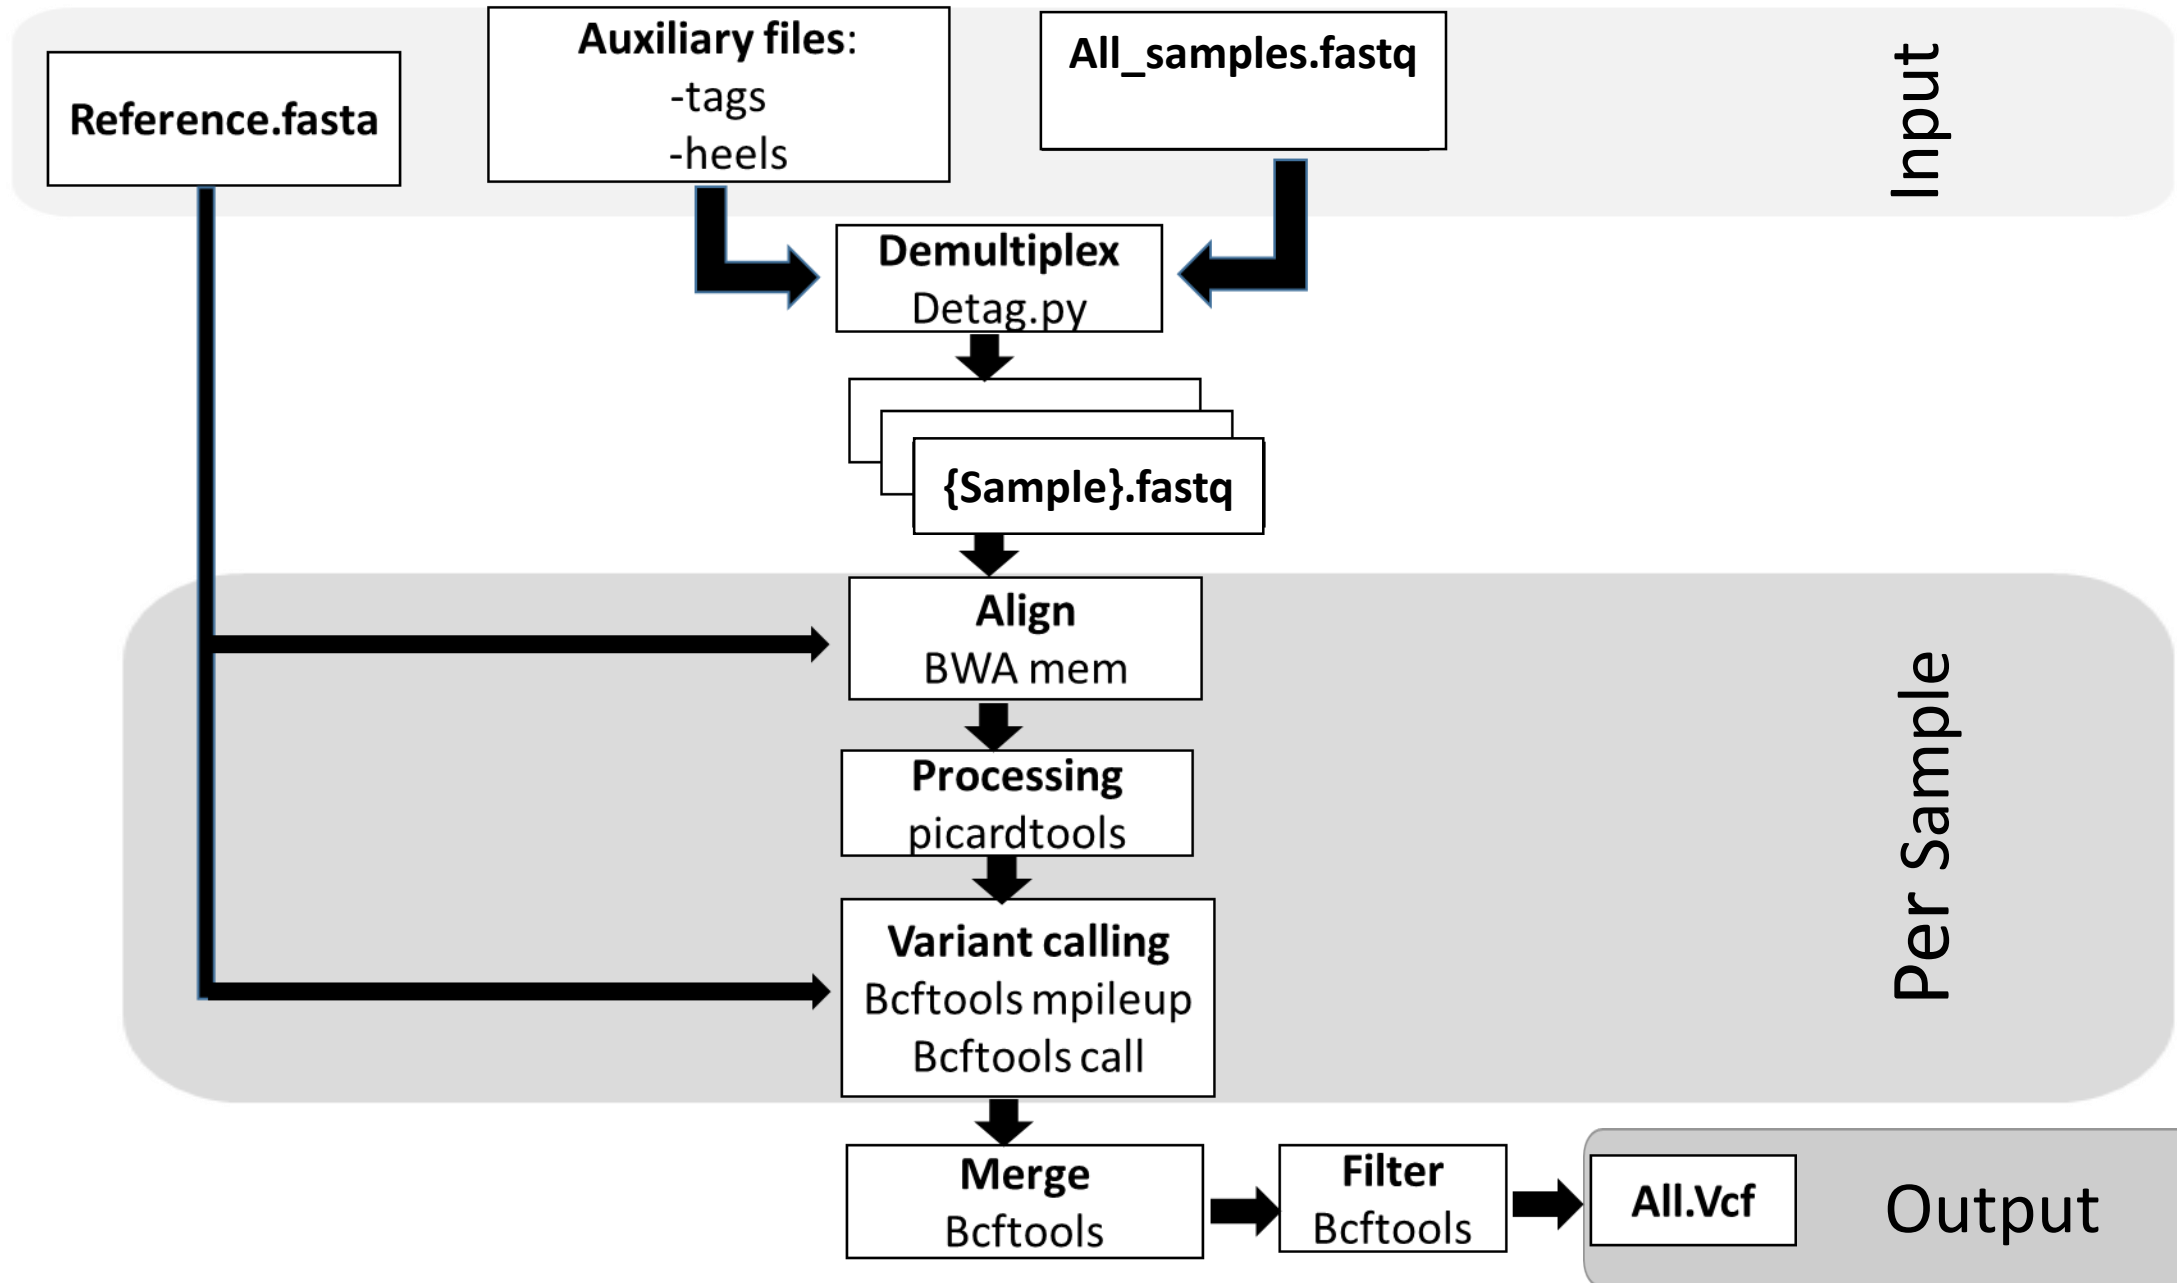

Supplement: s1 [file s1]
