# Supplementary material
Source: MDPI journal article supplement (https://www.mdpi.com/1999-4907/11/10/1083)
Supplement: s1 [file s1]

Supplementary Table 5a. Significantly associated SNP markers ( $P < 0.05$ ) and P-value adjusted after 10,000 permutations using GLM

| Marker            | Chr          | Pos   | p      | padj_10000 | PVE% | Annotation                                                    |
|-------------------|--------------|-------|--------|------------|------|---------------------------------------------------------------|
| SCONTIG5992_29927 | Scaffold5992 | 29927 | 0.0007 | 0.0199     | 5.8  | Peptidase S8, subtilisin-related Peptidase S8/S53 domain      |
| SCONTIG6368_39377 | Scaffold6368 | 39377 | 0.0220 | 0.5154     | 3.2  | Leucine-rich repeat Leucine-rich repeat-containing N-terminal |
| SCONTIG8553_81512 | Scaffold8553 | 81512 | 0.0460 | 0.8033     | 2.5  | unknown                                                       |
| SCONTIG874_32729  | Scaffold874  | 32729 | 0.0500 | 0.8297     | 2.7  | cytochrome p450 94a1-like                                     |

Supplementary fig 5b: Comparison of qqplot in GLM and MLM

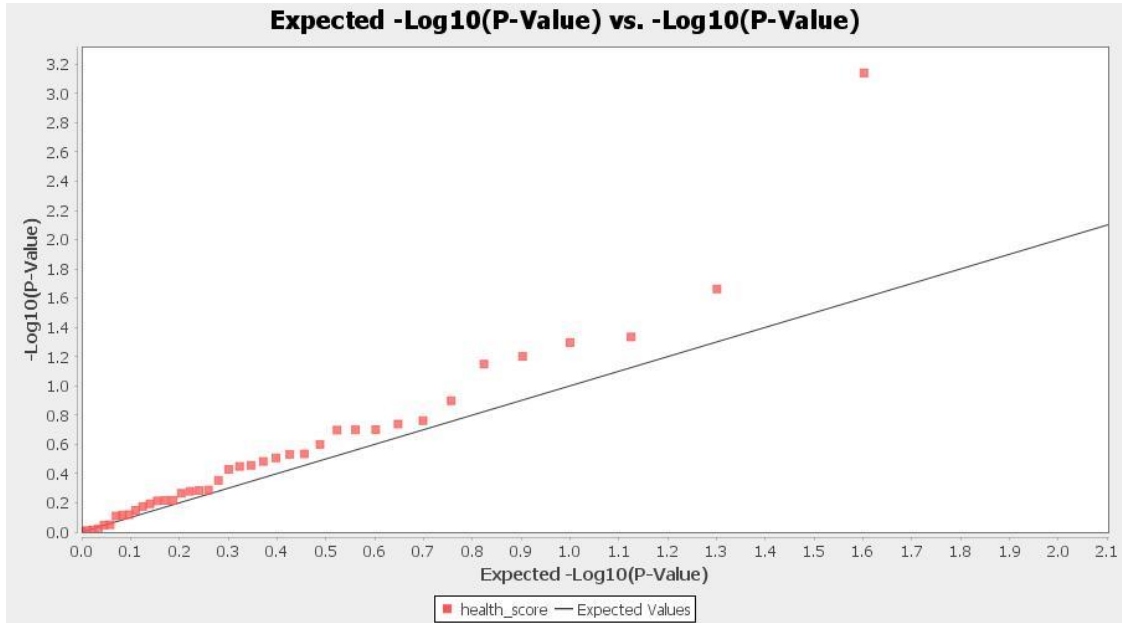

GLM

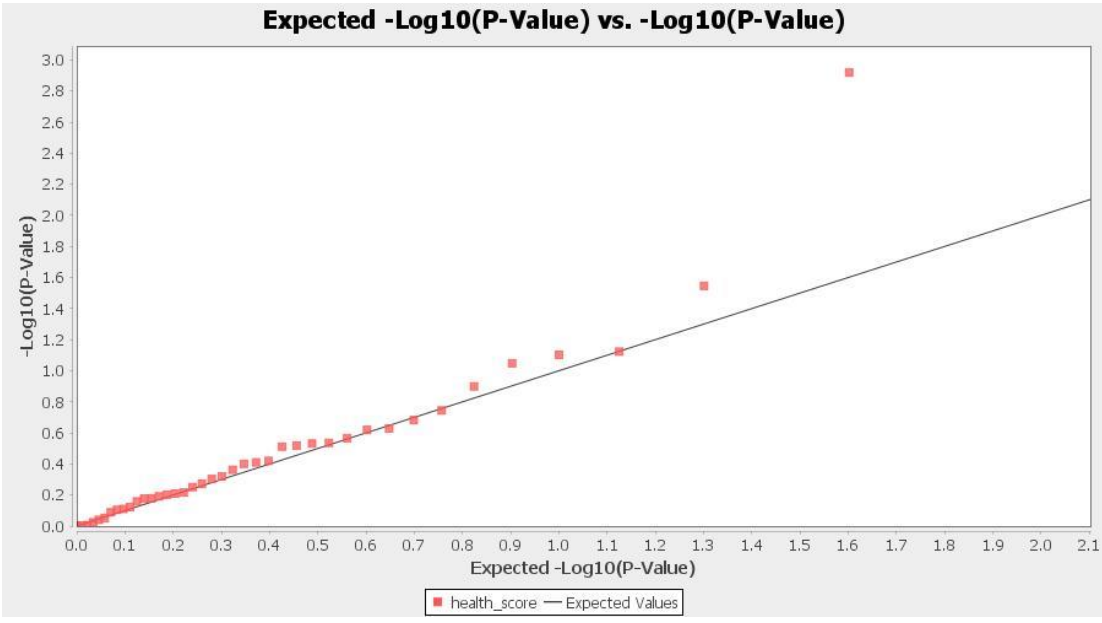

MLM
