# Supplementary material
Source: MDPI journal article supplement (https://www.mdpi.com/1999-4907/11/10/1083)
Supplement: s1 [file s1]

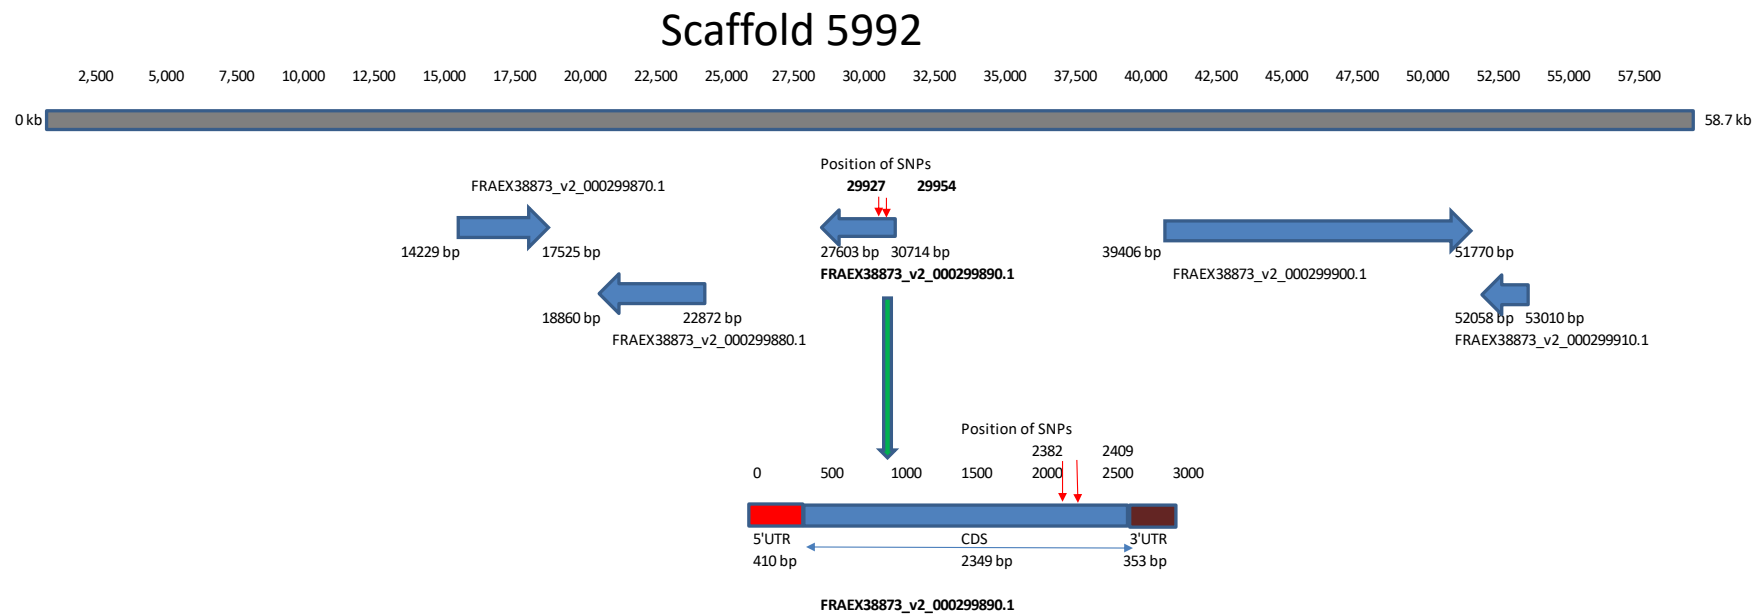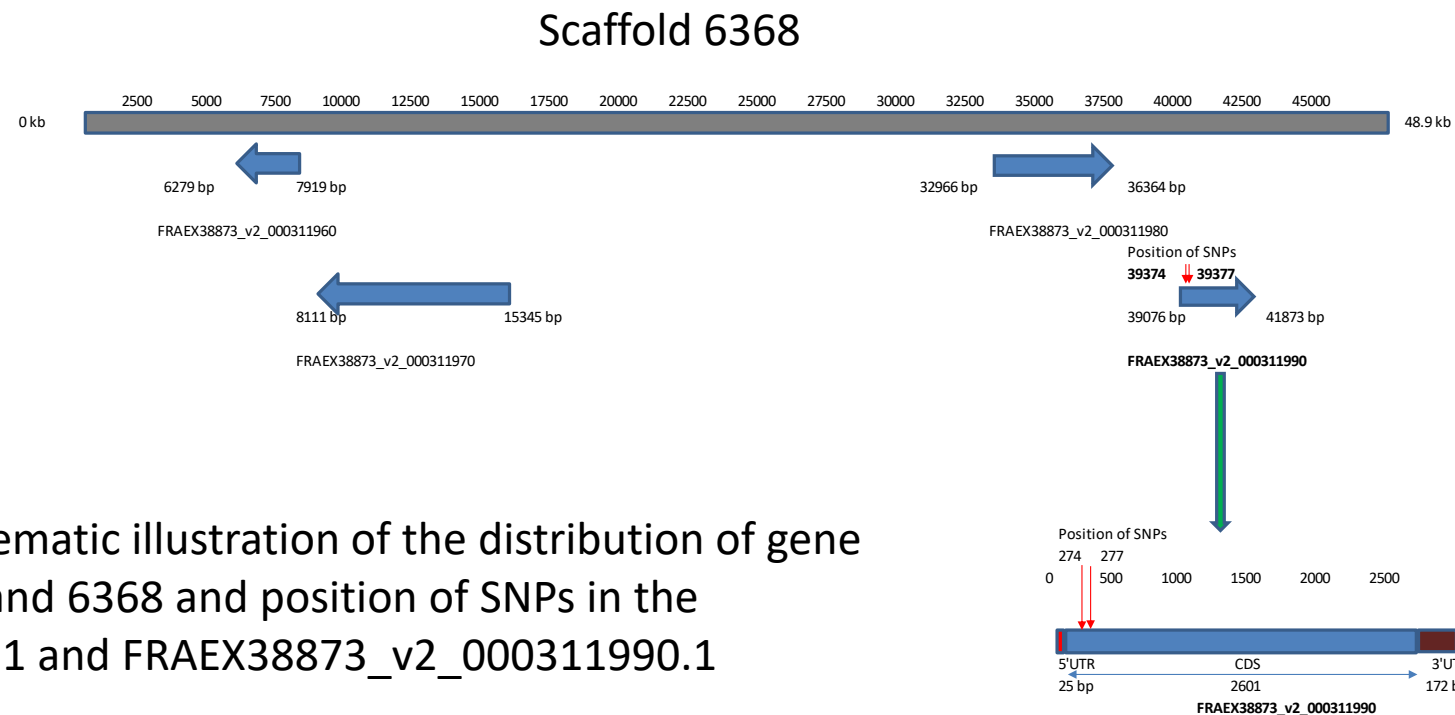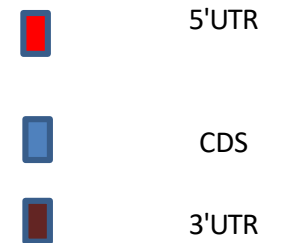

Supplementary figure 6: Schematic illustration of the distribution of gene models in the Scaffold 5992 and 6368 and position of SNPs in the FRAEX38873\_v2\_000299890.1 and FRAEX38873\_v2\_000311990.1
